# Supplementary material for: Cadherin-11 Is Required for Neural Crest Specification and Survival
Source: PubMed Central journal article supplement (PMC7662130; doi:10.3389/fphys.2020.563372), 2020-10-30
Supplement: Data_Sheet_1.pdf [file Data_Sheet_1.pdf]

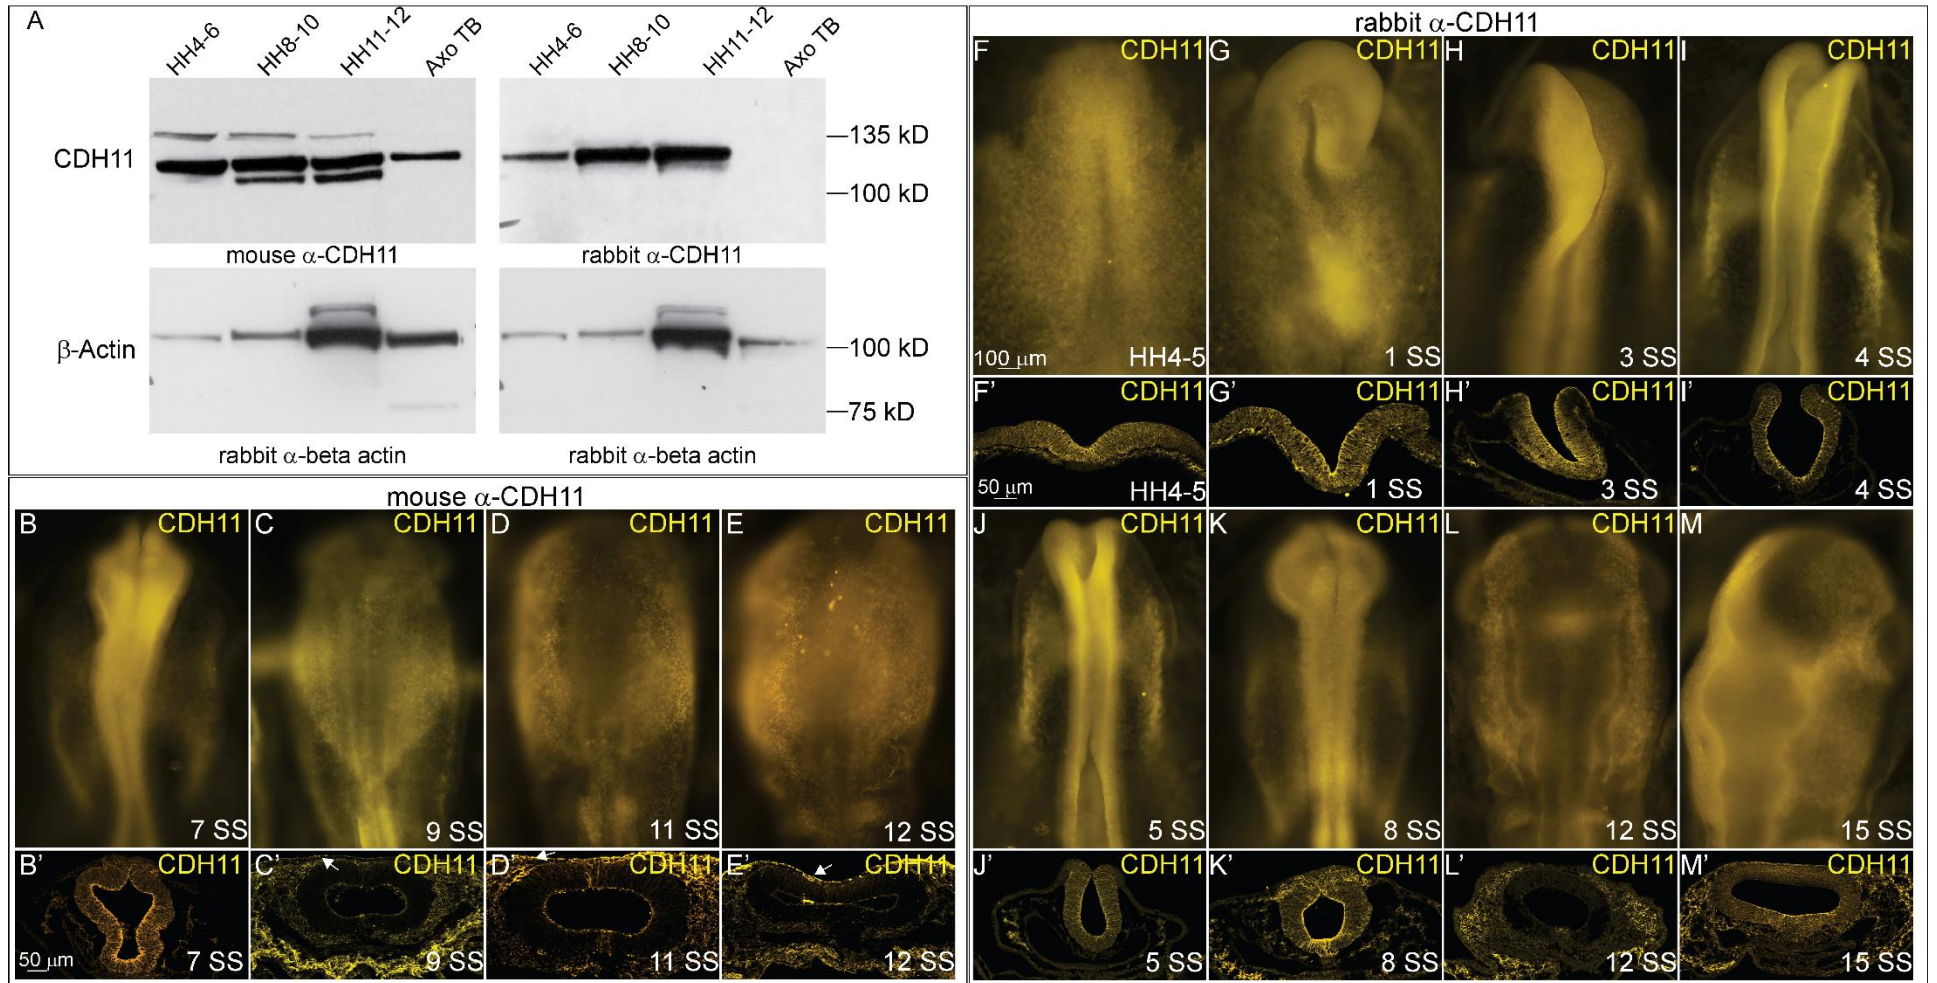

**Supp. Fig. 1. CHD11 expression in whole mount and sections.** To identify spatiotemporal localization in whole mount and in transverse sections, western blot analysis and IHC for CDH11 in protein lysate and uninjected embryos was performed. (A) Western blot analysis using protein lysate isolated from 10 pooled chick or axolotl embryos from stages: HH4-6, HH8-10, HH11-12, and tailbud axolotl embryos. Two antibodies were tested, mouse anti-CDH11 IgG1 or rabbit anti-CDH11 IgG. (B-I) Whole mount and (B'-I') transverse sections of (B-I) after IHC for CDH11 in (B, B') an HH4-5 embryo, (C, C') a 1 SS embryo, (D, D') a 3 SS embryo, (E, E') a 4 SS embryo, (F, F') a 5 SS embryo, (G, G') a 6 SS embryo, (H, H') a 12 SS embryo and (I, I') a 15 SS embryo. Scale bars are as marked (100  $\mu$ m for whole mount and 50  $\mu$ m for sections).

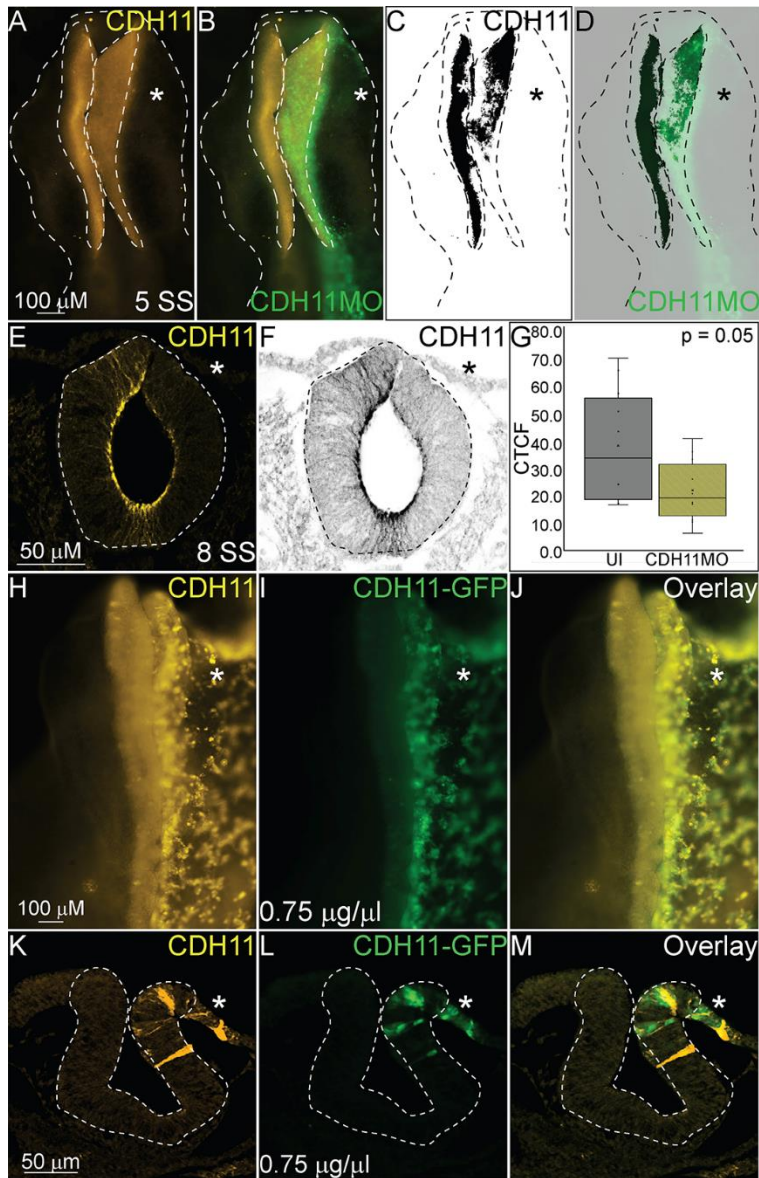

**Supp. Fig. 2. Efficiency of knockdown and overexpression tools.** To verify the efficiency and functionality of CDH11 translation blocking MO and CDH11-GFP full length expression vector, embryos were injected with either treatment and IHC was performed for CHD11. (A-G) IHC for CDH11 after CDH11MO electroporation at stage 4 shows that the CDH11MO efficiently inhibits the translation of CDH11 in the injected region of the neural tube. (A) Whole mount embryo after IHC for CDH11 and (B) overlay with CDH11MO (green) at 5 SS. (C) CDH11 threshold for fluorescence intensity analysis in whole mount embryos and (D) overlay with CDH11MO. Transverse section of 8 SS embryo showing IHC for CDH11 in (E) yellow and (F) grayscale. (G) Graph demonstrating CDH11 fluorescence intensity in uninjected vs. CDH11MO-injected sides of the neural tube (average fluorescence intensity of uninjected side is 39.33 and CDH11MO-injected side is 23.32,  $p = 0.05$ ,  $n = 10$ ). CDH11-GFP was electroporated into stage 4 embryos at 0.5 mg/ml and 0.75 mg/ml, and (H-J) IHC using for CDH11 shows that the CDH11-GFP ectopically expresses CDH11 in the neural tube. (K-M) Section of (H-J) after 0.75 mg/ml CDH11-GFP overexpression. Scale bars are as marked (100  $\mu\text{m}$  for whole mount and 50  $\mu\text{m}$  for sections).

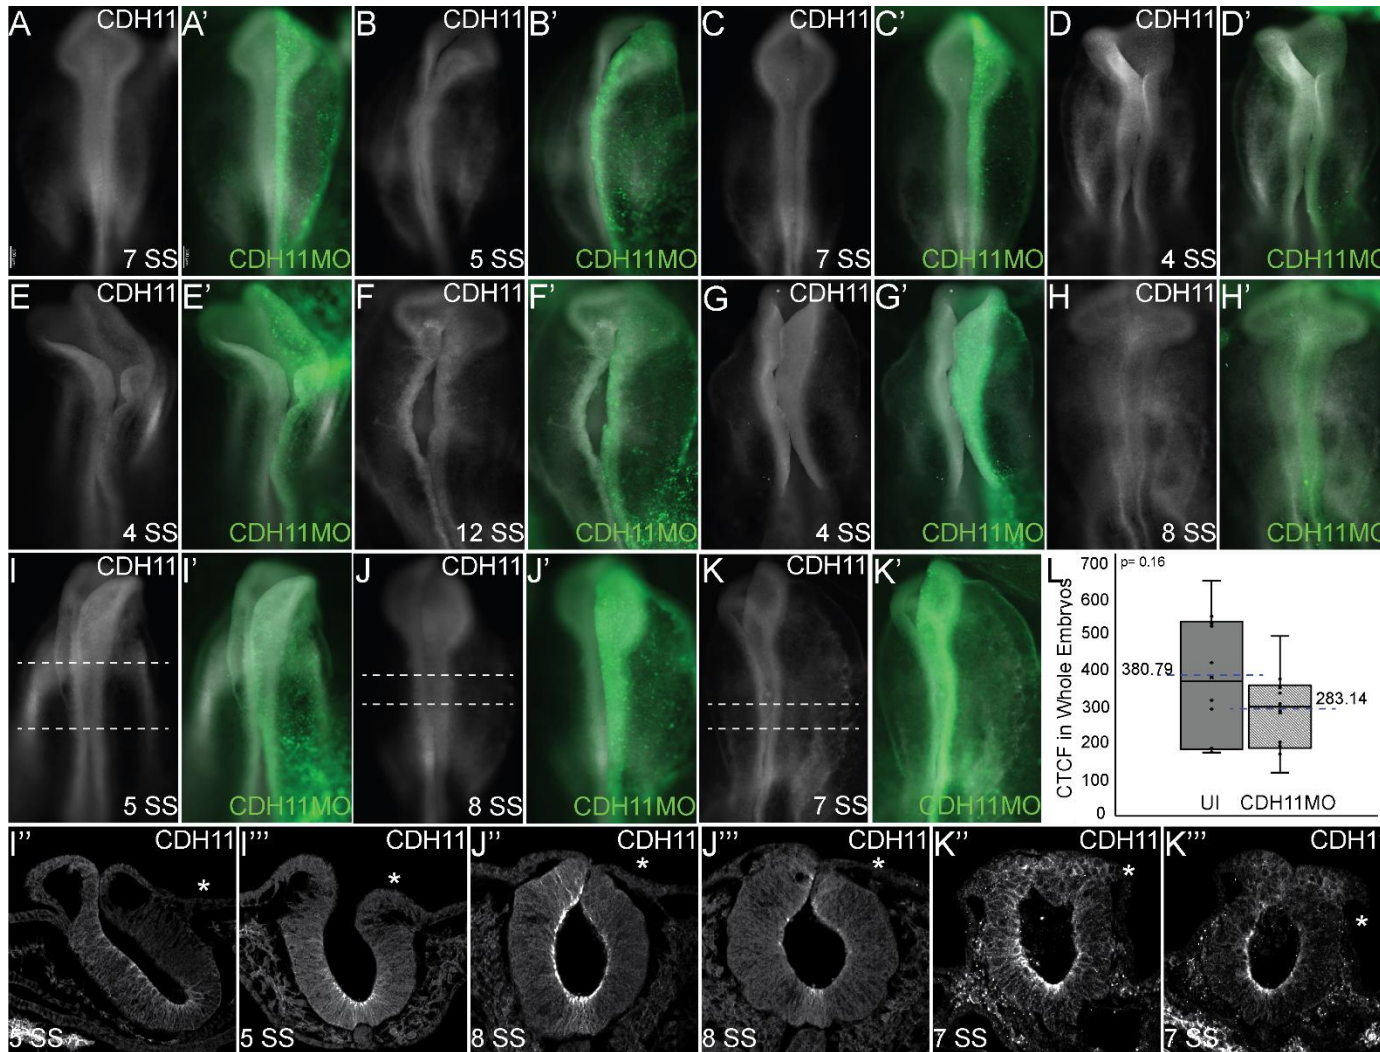

**Supp. Fig. 3. Efficiency of CDH11 knockdown in whole mount and at various axial levels.** To further confirm the efficiency and functionality of CDH11 translation blocking MO we measured fluorescence intensity in (A-L) multiple whole mount embryos using ImageJ, and found that due to the ectoderm-specific CDH11 knockdown and the internal (neural tube-specific) changes in expression after knockdown, CDH11 fluorescence levels were not significantly reduced when comparing the uninjected vs. CDH11MO-injected sides of the whole embryo (average fluorescence intensity

of uninjected side is 380.79 and CDH11MO-injected side is 283.114,  $p = 0.16$ ,  $n = 10$ ) as they were in the transverse sections (Fig. S2). To verify that the knockdown remained penetrant at different axial levels, (I'-K'') transverse sections from two regions in the cranial neural tube were visualized and the reduction in CDH11 protein is more evident in this orientation.

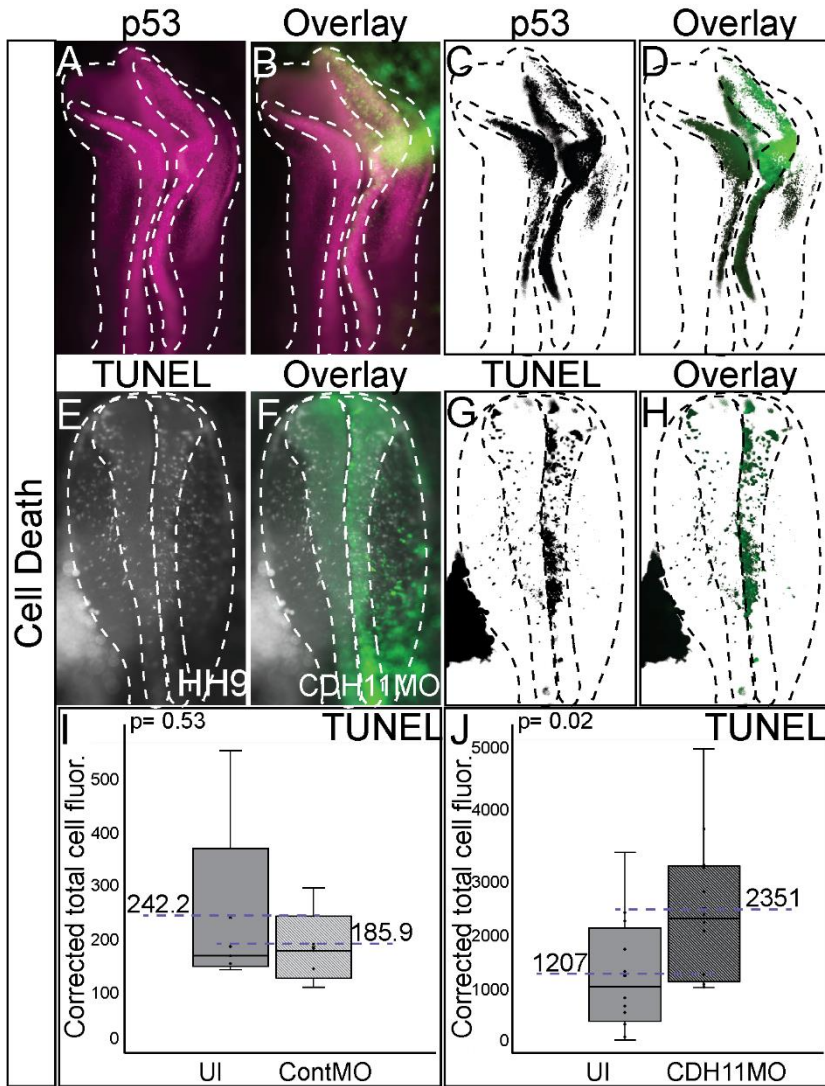

**Supp. Fig. 4. CDH11 knockdown increases p53 and TUNEL expression.** Embryos injected with CDH11MO at HH4 were fixed and IHC or TUNEL assay was performed in whole mount. (A) IHC for p53 and (B) overlay with CDH11MO in whole embryo. (C) p53 threshold image and (D) overlay with CDH11MO. (E) TUNEL assay in whole embryo, (F) overlay with CDH11MO (G) TUNEL threshold image and (H) overlay with CDH11MO. (I) Graph showing corrected total cell fluorescence in uninjected vs. ContMO-injected ( $n=12$ ,  $p=0.53$ ) and (J) shows TUNEL in uninjected vs. CDH11MO-injected embryos ( $n=12$ ,  $p=0.02$ ).

Supplemental Table 1. Changes in number of PAX7-expressing cells at different stages.

| HH5      |                                       |          |                                       | HH8-     |                                       |          |                                       | HH8      |                                       |          |                                       | HH9+     |                                       |          |                                       | Control  |                                       |         |                                       |
|----------|---------------------------------------|----------|---------------------------------------|----------|---------------------------------------|----------|---------------------------------------|----------|---------------------------------------|----------|---------------------------------------|----------|---------------------------------------|----------|---------------------------------------|----------|---------------------------------------|---------|---------------------------------------|
| UI       | Ave . # cells per 2-3 serial sections | CDH 11MO | Ave . # cells per 2-3 serial sections | UI       | Ave . # cells per 2-3 serial sections | CDH 11MO | Ave . # cells per 2-3 serial sections | UI       | Ave . # cells per 2-3 serial sections | CDH 11MO | Ave . # cells per 2-3 serial sections | UI       | Ave . # cells per 2-3 serial sections | CDH 11MO | Ave . # cells per 2-3 serial sections | UI       | Ave . # cells per 2-3 serial sections | Con tMO | Ave . # cells per 2-3 serial sections |
| 1        | 27                                    | 1        | 29                                    | 1        | 17                                    | 1        | 19                                    | 1        | 50                                    | 1        | 19                                    | 1        | 58                                    | 1        | 37                                    |          | 32                                    |         | 34                                    |
| 2        | 22                                    | 2        | 18                                    | 2        | 10                                    | 2        | 3                                     | 2        | 54                                    | 2        | 9                                     | 2        | 54                                    | 2        | 32                                    |          | 34                                    |         | 35                                    |
| 3        | 16                                    | 3        | 16                                    | 3        | 23                                    | 3        | 3                                     | 3        | 55                                    | 3        | 43                                    | 3        | 51                                    | 3        | 29                                    |          | 34                                    |         | 33                                    |
| 4        | 23                                    | 4        | 22                                    | 4        | 23                                    | 4        | 11                                    | 4        | 54                                    | 4        | 43                                    | 4        | 64                                    | 4        | 36                                    |          | 34                                    |         | 23                                    |
| 5        | 15                                    | 5        | 14                                    | 5        | 23                                    | 5        | 16                                    | 5        | 59                                    | 5        | 44                                    | 5        | 57                                    | 5        | 39                                    |          | 56                                    |         | 54                                    |
| 6        | 20                                    | 6        | 11                                    | 6        | 21                                    | 6        | 18                                    | 6        | 38                                    | 6        | 17                                    | 6        | 71                                    | 6        | 62                                    |          | 56                                    |         | 47                                    |
|          |                                       |          |                                       | 7        | 21                                    | 7        | 13                                    | 7        | 88                                    | 7        | 43                                    | 7        | 37                                    | 7        | 21                                    |          | 50                                    |         | 49                                    |
|          |                                       |          |                                       | 8        | 24                                    | 8        | 15                                    | 8        | 83                                    | 8        | 39                                    |          |                                       |          |                                       |          | 32                                    |         | 23                                    |
|          |                                       |          |                                       | 9        | 16                                    | 9        | 20                                    | 9        | 43                                    | 9        | 22                                    |          |                                       |          |                                       |          | 14                                    |         | 15                                    |
|          |                                       |          |                                       | 10       | 20                                    | 10       | 15                                    | 10       | 55                                    | 10       | 32                                    |          |                                       |          |                                       |          | 25                                    |         | 20                                    |
|          |                                       |          |                                       | 11       | 20                                    | 11       | 40                                    | 11       | 31                                    | 11       | 10                                    |          |                                       |          |                                       |          | 23                                    |         | 25                                    |
|          |                                       |          |                                       | 12       | 28                                    | 12       | 34                                    | 12       | 32                                    | 12       | 17                                    |          |                                       |          |                                       |          | 33                                    |         | 41                                    |
|          |                                       |          |                                       | 13       | 28                                    | 13       | 48                                    | 13       | 29                                    | 13       | 22                                    |          |                                       |          |                                       |          | 36                                    |         | 41                                    |
|          |                                       |          |                                       | 14       | 26                                    | 14       | 41                                    | 14       | 29                                    | 14       | 21                                    |          |                                       |          |                                       |          | 43                                    |         | 41                                    |
|          |                                       |          |                                       |          |                                       |          |                                       | 15       | 54                                    | 15       | 32                                    |          |                                       |          |                                       |          |                                       |         |                                       |
|          |                                       |          |                                       |          |                                       |          |                                       | 16       | 51                                    | 16       | 29                                    |          |                                       |          |                                       |          |                                       |         |                                       |
|          |                                       |          |                                       |          |                                       |          |                                       | 17       | 64                                    | 17       | 36                                    |          |                                       |          |                                       |          |                                       |         |                                       |
|          |                                       |          |                                       |          |                                       |          |                                       | 18       | 57                                    | 18       | 39                                    |          |                                       |          |                                       |          |                                       |         |                                       |
|          |                                       |          |                                       |          |                                       |          |                                       | 19       | 15                                    | 19       | 51                                    |          |                                       |          |                                       |          |                                       |         |                                       |
| Mean     | 20.50                                 |          | 18.33                                 | Mean     | 21.43                                 |          | 21.14                                 | Mean     | 49.53                                 |          | 29.89                                 | Mean     | 56.00                                 |          | 36.57                                 | Mean     | 35.86                                 |         | 34.36                                 |
| Median   | 21.00                                 |          | 17.00                                 | Median   | 22.00                                 |          | 17.00                                 | Median   | 54.00                                 |          | 32.00                                 | Median   | 57.00                                 |          | 36.00                                 | Median   | 34.00                                 |         | 34.50                                 |
| Standard | 4.51                                  |          | 6.41                                  | Standard | 4.85                                  |          | 14.09                                 | Standard | 18.16                                 |          | 12.60                                 | Standard | 10.68                                 |          | 12.74                                 | Standard | 12.00                                 |         | 11.84                                 |

|                                    |      |  |  |                                    |      |  |  |                                    |        |  |  |                                    |      |  |  |                                    |      |  |  |
|------------------------------------|------|--|--|------------------------------------|------|--|--|------------------------------------|--------|--|--|------------------------------------|------|--|--|------------------------------------|------|--|--|
| Deviation                          |      |  |  | Deviation                          |      |  |  | Deviation                          |        |  |  | Deviation                          |      |  |  | Deviation                          |      |  |  |
| Student's T-Test (2 tails, type 3) | 0.52 |  |  | Student's T-Test (2 tails, type 3) | 0.94 |  |  | Student's T-Test (2 tails, type 3) | 0.0005 |  |  | Student's T-Test (2 tails, type 3) | 0.01 |  |  | Student's T-Test (2 tails, type 3) | 0.74 |  |  |

**Supplemental Table 2. Changes in number of PAX7, SOX9, SNAI2, and SOX10-expressing cells.**

| PAX7 |                                      |          |                                      | PAX7 |                                      |          |                                      | SOX9 |                                      |          |                                      | SNAI2 |                                      |          |                                      | SOX10 |                                      |          |                                      |
|------|--------------------------------------|----------|--------------------------------------|------|--------------------------------------|----------|--------------------------------------|------|--------------------------------------|----------|--------------------------------------|-------|--------------------------------------|----------|--------------------------------------|-------|--------------------------------------|----------|--------------------------------------|
| UI   | Ave. # cells per 2-3 serial sections | CDH11 MO | Ave. # cells per 2-3 serial sections | UI   | Ave. # cells per 2-3 serial sections | CDH11 MO | Ave. # cells per 2-3 serial sections | UI   | Ave. # cells per 2-3 serial sections | CDH11 MO | Ave. # cells per 2-3 serial sections | UI    | Ave. # cells per 2-3 serial sections | CDH11 MO | Ave. # cells per 2-3 serial sections | UI    | Ave. # cells per 2-3 serial sections | CDH11 MO | Ave. # cells per 2-3 serial sections |
| 1    | 40.33                                | 1        | 15.67                                | 1    | 32.00                                | 1        | 34.00                                | 1    | 39.00                                | 1        | 22.00                                | 1     | 24.00                                | 1        | 15.00                                | 1     | 23.00                                | 1        | 19.00                                |
| 2    | 51.00                                | 2        | 48.33                                | 2    | 34.00                                | 2        | 35.00                                | 2    | 21.00                                | 2        | 9.00                                 | 2     | 22.00                                | 2        | 5.00                                 | 2     | 26.00                                | 2        | 14.00                                |
| 3    | 38.00                                | 3        | 17.00                                | 3    | 34.00                                | 3        | 33.00                                | 3    | 17.00                                | 3        | 6.50                                 | 3     | 27.00                                | 3        | 14.00                                | 3     | 27.00                                | 3        | 14.00                                |
| 4    | 16.50                                | 4        | 3.00                                 | 4    | 34.00                                | 4        | 23.00                                | 4    | 41.67                                | 4        | 19.00                                | 4     | 25.00                                | 4        | 14.00                                | 4     | 22.00                                | 4        | 10.00                                |
| 5    | 47.00                                | 5        | 3.00                                 | 5    | 56.00                                | 5        | 54.00                                | 5    | 7.50                                 | 5        | 7.00                                 | 5     | 26.00                                | 5        | 12.00                                | 5     | 16.00                                | 5        | 17.00                                |
| 6    | 40.33                                | 6        | 21.67                                | 6    | 56.00                                | 6        | 47.00                                | 6    | 15.25                                | 6        | 12.50                                | 6     | 17.00                                | 6        | 8.00                                 | 6     | 23.00                                | 6        | 16.00                                |
| 7    | 28.67                                | 7        | 14.33                                | 7    | 50.00                                | 7        | 49.00                                | 7    | 12.83                                | 7        | 8.50                                 | 7     | 10.00                                | 7        | 14.00                                | 7     | 11.00                                | 7        | 2.00                                 |
| 8    | 22.00                                | 8        | 15.33                                | 8    | 32.00                                | 8        | 23.00                                | 8    | 9.50                                 | 8        | 5.50                                 | 8     | 17.00                                | 8        | 17.00                                | 8     | 9.00                                 | 8        | 1.00                                 |
| 9    | 85.50                                | 9        | 41.00                                | 9    | 14.00                                | 9        | 15.00                                | 9    | 14.00                                | 9        | 12.33                                | 9     | 23.00                                | 9        | 9.00                                 | 9     | 9.00                                 | 9        | 1.00                                 |
| 10   | 24.67                                | 10       | 21.00                                | 10   | 25.00                                | 10       | 20.00                                | 10   | 16.50                                | 10       | 12.50                                | 10    | 16.00                                | 10       | 7.00                                 | 10    | 6.00                                 | 10       | 3.00                                 |
| 11   | 56.50                                | 11       | 34.00                                | 11   | 23.00                                | 11       | 25.00                                | 11   | 29.50                                | 11       | 15.50                                | 11    | 13.00                                | 11       | 6.00                                 | 11    | 6.00                                 | 11       | 3.00                                 |
| 12   | 71.00                                | 12       | 62.00                                | 12   | 33.00                                | 12       | 41.00                                |      |                                      |          |                                      | 12    | 29.00                                | 12       | 9.00                                 | 12    | 9.67                                 | 12       | 4.58                                 |
| 13   | 37.00                                | 13       | 21.00                                | 13   | 36.00                                | 13       | 41.00                                |      |                                      |          |                                      | 13    | 25.00                                | 13       | 18.00                                | 13    | 27.00                                | 13       | 9.00                                 |
| 14   | 41.50                                | 14       | 25.00                                | 14   | 43.00                                | 14       | 41.00                                |      |                                      |          |                                      | 14    | 42.00                                | 14       | 31.00                                | 14    | 20.00                                | 14       | 10.00                                |
| 15   | 64.00                                | 15       | 49.50                                |      |                                      |          |                                      |      |                                      |          |                                      | 15    | 29.00                                | 15       | 21.00                                | 15    | 18.00                                | 15       | 17.00                                |
| 16   | 27.00                                | 16       | 44.50                                |      |                                      |          |                                      |      |                                      |          |                                      | 16    | 19.00                                | 16       | 20.00                                | 16    | 17.00                                | 16       | 11.00                                |
| 17   | 21.00                                | 17       | 41.67                                |      |                                      |          |                                      |      |                                      |          |                                      |       |                                      |          |                                      | 17    | 37.00                                | 17       | 19.00                                |
| 18   | 58.00                                | 18       | 37.00                                |      |                                      |          |                                      |      |                                      |          |                                      |       |                                      |          |                                      | 18    | 30.00                                | 18       | 26.00                                |
|      |                                      |          |                                      |      |                                      |          |                                      |      |                                      |          |                                      |       |                                      |          |                                      | 19    | 50.00                                | 19       | 29.00                                |

|           |       |       |           |       |       |                      |       |       |                      |       |       |                      |       |       |
|-----------|-------|-------|-----------|-------|-------|----------------------|-------|-------|----------------------|-------|-------|----------------------|-------|-------|
| Mean      | 42.78 | 28.61 | Mean      | 35.86 | 34.36 | Mean                 | 20.34 | 11.85 | Mean                 | 22.75 | 13.75 | Mean                 | 20.35 | 11.87 |
| Median    | 40.33 | 23.33 | Median    | 34.00 | 34.50 | Median               | 16.50 | 12.33 | Median               | 23.50 | 14.00 | Median               | 20.00 | 11.00 |
| Standard  | 18.82 | 16.78 | Standard  | 12.00 | 11.84 | Standard Deviation   | 11.48 | 5.29  | Standard Deviation   | 7.63  | 6.75  | Standard Deviation   | 11.29 | 8.28  |
| Student's | 0.02  |       | Student's | 0.74  |       | Student's T-Test / 2 | 0.04  |       | Student's T-Test / 2 | 0.001 |       | Student's T-Test / 2 | 0.01  |       |

**Supplemental Table 3. Changes in number of Caspase-expressing apoptotic bodies and PH3-cells.**

| CASPASE |                                                 |         |                                                 | CASPASE |                                                 |        |                                                 | PH3 |                                      |         |                                      | PH3 |                                      |        |                                      |
|---------|-------------------------------------------------|---------|-------------------------------------------------|---------|-------------------------------------------------|--------|-------------------------------------------------|-----|--------------------------------------|---------|--------------------------------------|-----|--------------------------------------|--------|--------------------------------------|
| UI      | Ave. # apoptotic bodies per 2-3 serial sections | Cad11MO | Ave. # apoptotic bodies per 2-3 serial sections | UI      | Ave. # apoptotic bodies per 2-3 serial sections | ContMO | Ave. # apoptotic bodies per 2-3 serial sections | UI  | Ave. # cells per 2-3 serial sections | Cad11MO | Ave. # cells per 2-3 serial sections | UI  | Ave. # cells per 2-3 serial sections | ContMO | Ave. # cells per 2-3 serial sections |
| 1       | 2.00                                            | 1       | 46.00                                           | 1       | 13.00                                           | 1      | 17.00                                           | 1   | 1.67                                 | 1       | 5.00                                 | 1   | 5.00                                 | 1      | 4.00                                 |
| 2       | 7.00                                            | 2       | 28.00                                           | 2       | 4.00                                            | 2      | 8.00                                            | 2   | 4.00                                 | 2       | 3.75                                 | 2   | 15.00                                | 2      | 7.00                                 |
| 3       | 37.50                                           | 3       | 31.00                                           | 3       | 2.00                                            | 3      | 6.00                                            | 3   | 5.00                                 | 3       | 2.50                                 | 3   | 3.00                                 | 3      | 3.00                                 |

|                                               |       |    |       |                       |       |    |       |                       |       |    |       |                       |      |   |      |
|-----------------------------------------------|-------|----|-------|-----------------------|-------|----|-------|-----------------------|-------|----|-------|-----------------------|------|---|------|
| 4                                             | 18.67 | 4  | 29.67 | 4                     | 4.00  | 4  | 6.00  | 4                     | 8.67  | 4  | 3.67  | 4                     | 7.00 | 4 | 6.00 |
| 5                                             | 14.67 | 5  | 27.33 | 5                     | 5.00  | 5  | 10.00 | 5                     | 3.33  | 5  | 2.00  | 5                     | 3.00 | 5 | 1.00 |
| 6                                             | 4.67  | 6  | 8.00  | 6                     | 5.00  | 6  | 8.00  | 6                     | 1.67  | 6  | 1.33  | 6                     | 1.00 | 6 | 2.00 |
| 7                                             | 2.50  | 7  | 19.50 | 7                     | 5.00  | 7  | 9.00  | 7                     | 0.50  | 7  | 1.50  | 7                     | 6.00 | 7 | 7.00 |
| 8                                             | 30.00 | 8  | 68.50 | 8                     | 10.00 | 8  | 13.00 | 8                     | 2.50  | 8  | 2.50  | 8                     | 7.00 | 8 | 8.00 |
| 9                                             | 10.00 | 9  | 16.00 | 9                     | 10.00 | 9  | 9.00  | 9                     | 0.00  | 9  | 6.00  |                       |      |   |      |
| 10                                            | 46.00 | 10 | 52.00 | 10                    | 16.00 | 10 | 3.00  | 10                    | 8.50  | 10 | 6.00  |                       |      |   |      |
| 11                                            | 3.00  | 11 | 15.00 | 11                    | 13.00 | 11 | 10.00 | 11                    | 17.00 | 11 | 17.00 |                       |      |   |      |
| 12                                            | 33.00 | 12 | 62.00 | 12                    | 20.00 | 12 | 14.00 | 12                    | 0.00  | 12 | 2.00  |                       |      |   |      |
| 13                                            | 20.67 | 13 | 37.00 | 13                    | 9.00  | 13 | 8.00  | 13                    | 2.00  | 13 | 4.00  |                       |      |   |      |
| 14                                            | 23.00 | 14 | 6.00  | 14                    | 15.00 | 14 | 9.00  | 14                    | 7.33  | 14 | 11.33 |                       |      |   |      |
|                                               |       |    |       |                       |       |    |       | 15                    | 4.00  | 15 | 2.33  |                       |      |   |      |
|                                               |       |    |       |                       |       |    |       | 16                    | 14.33 | 16 | 21.67 |                       |      |   |      |
|                                               |       |    |       |                       |       |    |       | 17                    | 9.50  | 17 | 10.50 |                       |      |   |      |
|                                               |       |    |       |                       |       |    |       | 18                    | 12.00 | 18 | 11.33 |                       |      |   |      |
|                                               |       |    |       |                       |       |    |       | 19                    | 3.67  | 19 | 5.33  |                       |      |   |      |
|                                               |       |    |       |                       |       |    |       | 20                    | 0.00  | 20 | 5.00  |                       |      |   |      |
| Me<br>an                                      | 18.05 |    | 31.86 | Mean                  | 9.36  |    | 9.29  | Mean                  | 5.28  |    | 6.24  | Mean                  | 5.88 |   | 4.75 |
| Me<br>dia<br>n                                | 16.67 |    | 28.83 | Median                | 9.50  |    | 9.00  | Median                | 3.83  |    | 4.50  | Median                | 5.50 |   | 5.00 |
| St<br>an<br>da<br>rd<br>De<br>via<br>tio<br>n | 14.31 |    | 19.32 | Standard<br>Deviation | 5.44  |    | 3.54  | Standard<br>Deviation | 4.97  |    | 5.48  | Standard<br>Deviation | 4.26 |   | 2.60 |



|                                    |       |  |  |                                    |      |  |  |                                    |      |  |  |                                    |      |  |
|------------------------------------|-------|--|--|------------------------------------|------|--|--|------------------------------------|------|--|--|------------------------------------|------|--|
| Student's T-Test (2 tails, type 3) | 0.042 |  |  | Student's T-Test (2 tails, type 3) | 0.97 |  |  | Student's T-Test (2 tails, type 3) | 0.57 |  |  | Student's T-Test (2 tails, type 3) | 0.54 |  |
|------------------------------------|-------|--|--|------------------------------------|------|--|--|------------------------------------|------|--|--|------------------------------------|------|--|

**Supplemental Table 4. Changes in number of PAX7-expressing cells after rescue.**

| PAX7 |                                      |          |                                      | PAX7 |                                      |                |                                      | PAX7 |                                      |                |                                      |
|------|--------------------------------------|----------|--------------------------------------|------|--------------------------------------|----------------|--------------------------------------|------|--------------------------------------|----------------|--------------------------------------|
| UI   | Ave. # cells per 1-3 serial sections | CDH11 MO | Ave. # cells per 1-3 serial sections | UI   | Ave. # cells per 2-3 serial sections | CDH11MO +CDH11 | Ave. # cells per 1-3 serial sections | UI   | Ave. # cells per 1-3 serial sections | CDH11MO +p53MO | Ave. # cells per 1-3 serial sections |
| 1    | 40.33                                | 1        | 15.67                                | 1    | 37.00                                | 1              | 62.00                                | 1    | 54.00                                | 1              | 19.00                                |
| 2    | 51.00                                | 2        | 48.33                                | 2    | 41.00                                | 2              | 58.00                                | 2    | 61.00                                | 2              | 6.00                                 |
| 3    | 38.00                                | 3        | 17.00                                | 3    | 53.00                                | 3              | 64.00                                | 3    | 33.00                                | 3              | 22.00                                |
| 4    | 16.50                                | 4        | 3.00                                 | 4    | 46.00                                | 4              | 51.00                                | 4    | 38.00                                | 4              | 34.00                                |
| 5    | 47.00                                | 5        | 3.00                                 | 5    | 45.00                                | 5              | 46.00                                | 5    | 21.00                                | 5              | 40.00                                |
| 6    | 40.33                                | 6        | 21.67                                | 6    | 39.00                                | 6              | 34.00                                | 6    | 26.00                                | 6              | 35.00                                |
| 7    | 28.67                                | 7        | 14.33                                | 7    | 80.00                                | 7              | 31.00                                | 7    | 47.00                                | 7              | 67.00                                |
| 8    | 22.00                                | 8        | 15.33                                | 8    | 50.00                                | 8              | 39.00                                | 8    | 43.00                                | 8              | 65.00                                |
| 9    | 85.50                                | 9        | 41.00                                | 9    | 38.00                                | 9              | 50.00                                | 9    | 7.00                                 | 9              | 10.00                                |
| 10   | 24.67                                | 10       | 21.00                                | 10   | 49.00                                | 10             | 63.00                                | 10   | 4.00                                 | 10             | 8.00                                 |
| 11   | 56.50                                | 11       | 34.00                                | 11   | 63.00                                | 11             | 101.00                               | 11   | 41.00                                | 11             | 40.00                                |
| 12   | 71.00                                | 12       | 62.00                                | 12   | 39.00                                | 12             | 62.00                                | 12   | 48.00                                | 12             | 79.00                                |
| 13   | 37.00                                | 13       | 21.00                                | 13   | 41.00                                | 13             | 83.00                                | 13   | 31.00                                | 13             | 44.00                                |
| 14   | 41.50                                | 14       | 25.00                                |      |                                      |                |                                      | 14   | 40.00                                | 14             | 53.00                                |
| 15   | 64.00                                | 15       | 49.50                                |      |                                      |                |                                      | 15   | 39.00                                | 15             | 66.00                                |

|                    |       |    |       |                    |       |  |  |                    |       |    |       |
|--------------------|-------|----|-------|--------------------|-------|--|--|--------------------|-------|----|-------|
| 16                 | 27.00 | 16 | 44.50 |                    |       |  |  | 16                 | 28.00 | 16 | 51.00 |
| 17                 | 21.00 | 17 | 41.67 |                    |       |  |  |                    |       |    |       |
| 18                 | 58.00 | 18 | 37.00 |                    |       |  |  |                    |       |    |       |
| Mean               | 42.78 |    |       | Mean               |       |  |  | Mean               |       |    |       |
|                    |       |    | 28.61 |                    | 47.77 |  |  |                    | 35.06 |    | 39.94 |
| Median             |       |    |       | Median             |       |  |  | Median             |       |    |       |
|                    | 40.33 |    | 23.33 |                    | 45.00 |  |  |                    | 38.50 |    | 40.00 |
| Standard Deviation |       |    |       | Standard Deviation |       |  |  | Standard Deviation |       |    |       |
|                    | 18.82 |    | 16.78 |                    | 12.15 |  |  |                    | 15.47 |    | 22.75 |
| Student's T-Test   |       |    |       | Student's T-Test   |       |  |  | Student's T-Test   |       |    |       |
|                    | 0.02  |    |       |                    | 0.15  |  |  |                    | 0.48  |    |       |

Supplemental Table 5. Changes in fluorescence and migration distance in vivo and cell size and migration ex vivo.

| CDH1 |                                   |           |                                   | PAX7 |                        |           |                        | SOX9 |                        |           |                        | Explant: Cell Size |                  |           |                  | Explant: Distance Migrated |                        |           |                        |
|------|-----------------------------------|-----------|-----------------------------------|------|------------------------|-----------|------------------------|------|------------------------|-----------|------------------------|--------------------|------------------|-----------|------------------|----------------------------|------------------------|-----------|------------------------|
| UI   | Corrected total cell fluorescence | CDH 11M O | Corrected total cell fluorescence | UI   | Distance migrated (µm) | CDH 11M O | Distance migrated (µm) | UI   | Distance migrated (µm) | CDH 11M O | Distance migrated (µm) | UI                 | Cell length (µm) | CDH 11M O | Cell length (µm) | UI                         | Distance migrated (µm) | CDH 11M O | Distance migrated (µm) |
| 1    | 1425.13                           | 1         | 1600.39                           | 1    | 144.70                 | 1         | 74.95                  | 1    | 189.11                 | 1         | 103.62                 | 1                  | 33.03            | 1         | 14.72            | 1                          | 86.79                  | 1         | 78.82                  |
| 2    | 1865.40                           | 2         | 2761.33                           | 2    | 103.02                 | 2         | 50.01                  | 2    | 170.39                 | 2         | 65.80                  | 2                  | 22.75            | 2         | 31.56            | 2                          | 67.63                  | 2         | 85.84                  |
| 3    | 1125.86                           | 3         | 1274.54                           | 3    | 159.30                 | 3         | 70.19                  | 3    | 121.43                 | 3         | 91.39                  | 3                  | 36.63            | 3         | 21.34            | 3                          | 78.59                  | 3         | 67.02                  |

|    |             |    |             |    |            |    |            |    |            |    |            |    |           |    |           |    |            |    |           |
|----|-------------|----|-------------|----|------------|----|------------|----|------------|----|------------|----|-----------|----|-----------|----|------------|----|-----------|
| 4  | 1367.<br>55 | 4  | 1488.<br>37 | 4  | 162.<br>43 | 4  | 72.8<br>1  | 4  | 36.3<br>3  | 4  | 32.0<br>1  | 4  | 28.<br>30 | 4  | 23.<br>67 | 4  | 100.<br>18 | 4  | 59.0<br>0 |
| 5  | 1846.<br>43 | 5  | 2125.<br>36 | 5  | 86.7<br>3  | 5  | 56.8<br>8  | 5  | 181.<br>28 | 5  | 168.<br>75 | 5  | 57.<br>43 | 5  | 16.<br>05 | 5  | 66.1<br>3  | 5  | 80.0<br>4 |
| 6  | 1400.<br>92 | 6  | 2258.<br>14 | 6  | 154.<br>02 | 6  | 119.<br>48 | 6  | 169.<br>58 | 6  | 133.<br>15 | 6  | 59.<br>09 | 6  | 11.<br>19 | 6  | 47.4<br>4  | 6  | 48.7<br>9 |
| 7  | 1275.<br>91 | 7  | 2657.<br>57 | 7  | 189.<br>67 | 7  | 142.<br>44 | 7  | 152.<br>03 | 7  | 149.<br>30 | 7  | 30.<br>04 | 7  | 17.<br>78 | 7  | 48.7<br>8  | 7  | 44.9<br>4 |
| 8  | 2157.<br>31 | 8  | 2438.<br>92 | 8  | 188.<br>96 | 8  | 39.2<br>7  | 8  | 160.<br>64 | 8  | 136.<br>67 | 8  | 37.<br>75 | 8  | 12.<br>75 | 8  | 55.6<br>1  | 8  | 41.4<br>7 |
| 9  | 2371.<br>54 | 9  | 3222.<br>17 | 9  | 247.<br>83 | 9  | 206.<br>01 | 9  | 253.<br>09 | 9  | 215.<br>33 | 9  | 25.<br>42 | 9  | 9.2<br>2  | 9  | 87.5<br>2  | 9  | 43.6<br>8 |
| 10 | 2646.<br>83 | 10 | 2648.<br>73 | 10 | 199.<br>09 | 10 | 106.<br>24 | 10 | 102.<br>43 | 10 | 62.2<br>8  | 10 | 22.<br>90 | 10 | 11.<br>73 | 10 | 94.6<br>8  | 10 | 56.7<br>6 |
| 11 | 2067.<br>15 | 11 | 2850.<br>50 | 11 | 142.<br>59 | 11 | 61.8<br>2  | 11 | 124.<br>75 | 11 | 73.9<br>9  | 11 | 52.<br>54 | 11 | 10.<br>83 | 11 | 86.5<br>4  | 11 | 67.7<br>8 |
| 12 | 1958.<br>55 | 12 | 2772.<br>24 |    |            |    |            | 12 | 187.<br>73 | 12 | 111.<br>10 | 12 | 35.<br>18 | 12 | 12.<br>60 | 12 | 43.1<br>6  | 12 | 59.5<br>8 |
| 13 | 2147.<br>77 | 13 | 2160.<br>19 |    |            |    |            | 13 | 185.<br>59 | 13 | 123.<br>45 | 13 | 23.<br>49 | 13 | 30.<br>26 | 13 | 63.0<br>5  | 13 | 58.6<br>7 |
|    |             |    |             |    |            |    |            | 14 | 154.<br>84 | 14 | 110.<br>03 | 14 | 41.<br>85 | 14 | 13.<br>89 | 14 | 94.6<br>6  | 14 | 57.6<br>1 |
|    |             |    |             |    |            |    |            | 15 | 185.<br>65 | 15 | 142.<br>77 | 15 | 49.<br>38 | 15 | 17.<br>84 | 15 | 61.4<br>2  | 15 | 41.9<br>6 |
|    |             |    |             |    |            |    |            | 16 | 180.<br>16 | 16 | 86.0<br>4  | 16 | 36.<br>34 | 16 | 19.<br>07 | 16 | 54.4<br>1  | 16 | 42.7<br>5 |
|    |             |    |             |    |            |    |            | 17 | 317.<br>04 | 17 | 232.<br>10 | 17 | 34.<br>79 | 17 | 26.<br>30 | 17 | 116.<br>65 | 17 | 61.6<br>5 |
|    |             |    |             |    |            |    |            | 18 | 176.<br>29 | 18 | 104.<br>15 | 18 | 43.<br>96 | 18 | 13.<br>06 |    |            |    |           |
|    |             |    |             |    |            |    |            | 19 | 122.<br>12 | 19 | 47.2<br>6  | 19 | 32.<br>89 | 19 | 40.<br>49 |    |            |    |           |
|    |             |    |             |    |            |    |            |    |            |    |            | 20 | 28.<br>61 | 20 | 21.<br>18 |    |            |    |           |
|    |             |    |             |    |            |    |            |    |            |    |            | 21 | 34.<br>43 | 21 | 15.<br>61 |    |            |    |           |
|    |             |    |             |    |            |    |            |    |            |    |            | 22 | 45.<br>47 | 22 | 20.<br>22 |    |            |    |           |

|                                    |         |         |                                    |        |       |                                    |        |        |                                    |       |       |                                    |       |       |       |  |  |  |  |
|------------------------------------|---------|---------|------------------------------------|--------|-------|------------------------------------|--------|--------|------------------------------------|-------|-------|------------------------------------|-------|-------|-------|--|--|--|--|
|                                    |         |         |                                    |        |       |                                    |        |        |                                    |       |       | 23                                 | 34.74 | 23    | 26.44 |  |  |  |  |
| Mean                               | 1819.72 | 2327.57 | Mean                               | 161.67 | 90.92 | Mean                               | 166.87 | 115.22 | Mean                               | 36.83 | 19.03 | Mean                               | 73.72 | 58.61 |       |  |  |  |  |
| Median                             | 1865.40 | 2438.92 | Median                             | 159.30 | 72.81 | Median                             | 170.39 | 110.03 | Median                             | 34.79 | 17.78 | Median                             | 67.63 | 58.67 |       |  |  |  |  |
| Standard Deviation                 | 466.03  | 584.50  | Standard Deviation                 | 44.86  | 49.30 | Standard Deviation                 | 57.52  | 52.45  | Standard Deviation                 | 10.47 | 7.83  | Standard Deviation                 | 21.33 | 13.94 |       |  |  |  |  |
| Student's T-Test (2 tails, type 3) | 0.02    |         | Student's T-Test (2 tails, type 3) | 0.002  |       | Student's T-Test (2 tails, type 3) | 0.006  |        | Student's T-Test (2 tails, type 3) | 0.000 |       | Student's T-Test (2 tails, type 3) | 0.02  |       |       |  |  |  |  |

**Supplemental Table 6. Changes in p53 and TUNEL fluorescence intensity.**

| p53-Relative Fluorescence |                                   |         |                                   | TUNEL-Relative Fluorescence |                                   |         |                                   |
|---------------------------|-----------------------------------|---------|-----------------------------------|-----------------------------|-----------------------------------|---------|-----------------------------------|
| UI                        | Corrected total cell fluorescence | Cad11MO | Corrected total cell fluorescence | UI                          | Corrected total cell fluorescence | CDH11MO | Corrected total cell fluorescence |
| 1                         | 83.292                            | 1       | 194.848                           | 1                           | 1650.97                           | 1       | 3102.00                           |
| 2                         | 55.706                            | 2       | 270.756                           | 2                           | 2284.32                           | 2       | 2113.74                           |
| 3                         | 38.477                            | 3       | 97.472                            | 3                           | 669.18                            | 3       | 1965.99                           |
| 4                         | 30.98                             | 4       | 47.83                             | 4                           | 1200.18                           | 4       | 2639.81                           |
| 5                         | 31.68                             | 5       | 45.70                             | 5                           | 91.00                             | 5       | 1222.46                           |
| 6                         | 42.68                             | 6       | 57.61                             | 6                           | 2138.25                           | 6       | 5100.72                           |
| 7                         | 30.59                             | 7       | 28.18                             | 7                           | 3324.80                           | 7       | 3724.42                           |
| 8                         | 29.02                             | 8       | 39.44                             | 8                           | 1263.35                           | 8       | 1047.61                           |
| 9                         | 25.01                             | 9       | 41.39                             | 9                           | 354.55                            | 9       | 2250.51                           |
| 10                        | 75.79                             | 10      | 94.10                             | 10                          | 136.55                            | 10      | 993.16                            |
| 11                        | 52.165                            | 11      | 53.672                            | 11                          | 563.65                            | 11      | 995.37                            |
| 12                        | 39.783                            | 12      | 55.91                             | 12                          | 811.90                            | 12      | 3057.54                           |

|                                    |        |    |         |                                    |         |  |         |
|------------------------------------|--------|----|---------|------------------------------------|---------|--|---------|
| 13                                 | 26.242 | 13 | 32.498  |                                    |         |  |         |
| 14                                 | 60.514 | 14 | 163.064 |                                    |         |  |         |
| 15                                 | 58.905 | 15 | 96.506  |                                    |         |  |         |
| 16                                 | 79.92  | 16 | 120.04  |                                    |         |  |         |
| 17                                 | 52.77  | 17 | 72.67   |                                    |         |  |         |
|                                    |        |    |         |                                    |         |  |         |
| Mean                               | 47.85  |    | 88.92   | Mean                               | 1207.39 |  | 2351.11 |
| Median                             | 42.68  |    | 57.61   | Median                             | 1006.04 |  | 2182.12 |
| Standard Deviation                 | 19.07  |    | 65.96   | Standard Deviation                 | 985.83  |  | 1259.96 |
| Student's T-Test (2 tails, type 3) | 0.02   |    |         | Student's T-Test (2 tails, type 3) | 0.02    |  |         |

**Supplemental Table 7. Changes in number of Caspase-expressing apoptotic bodies after rescue.**

| Caspase |                                                 |          |                                                 | Caspase |                                                 |        |                                                 | Caspase |                                                 |                |                                                 |
|---------|-------------------------------------------------|----------|-------------------------------------------------|---------|-------------------------------------------------|--------|-------------------------------------------------|---------|-------------------------------------------------|----------------|-------------------------------------------------|
| UI      | Ave. # apoptotic bodies per 1-3 serial sections | CDH11 MO | Ave. # apoptotic bodies per 1-3 serial sections | UI      | Ave. # apoptotic bodies per 1-3 serial sections | p53 MO | Ave. # apoptotic bodies per 1-3 serial sections | UI      | Ave. # apoptotic bodies per 1-3 serial sections | CDH11MO +p53MO | Ave. # apoptotic bodies per 1-3 serial sections |
| 1       | 0.00                                            | 1        | 46.00                                           | 1       | 63.00                                           | 1      | 56.00                                           | 1       | 35.00                                           | 1              | 12.00                                           |
| 2       | 7.00                                            | 2        | 28.00                                           | 2       | 55.00                                           | 2      | 75.00                                           | 2       | 5.00                                            | 2              | 2.00                                            |
| 3       | 37.50                                           | 3        | 31.00                                           | 3       | 23.00                                           | 3      | 24.00                                           | 3       | 5.00                                            | 3              | 3.00                                            |
| 4       | 18.67                                           | 4        | 29.67                                           | 4       | 84.00                                           | 4      | 36.00                                           | 4       | 15.00                                           | 4              | 12.00                                           |
| 5       | 14.67                                           | 5        | 27.33                                           | 5       | 42.00                                           | 5      | 30.00                                           | 5       | 19.00                                           | 5              | 22.00                                           |
| 6       | 4.67                                            | 6        | 8.00                                            | 6       | 32.00                                           | 6      | 35.00                                           | 6       | 1.00                                            | 6              | 5.00                                            |
| 7       | 2.50                                            | 7        | 19.50                                           | 7       | 32.00                                           | 7      | 48.00                                           | 7       | 24.00                                           | 7              | 8.00                                            |
| 8       | 30.00                                           | 8        | 68.50                                           | 8       | 25.00                                           | 8      | 26.00                                           | 8       | 47.00                                           | 8              | 38.00                                           |
| 9       | 10.00                                           | 9        | 16.00                                           | 9       | 35.00                                           | 9      | 30.00                                           | 9       | 23.00                                           | 9              | 35.00                                           |
| 10      | 46.00                                           | 10       | 52.00                                           | 10      | 11.00                                           | 10     | 8.00                                            | 10      | 16.00                                           | 10             | 26.00                                           |
| 11      | 3.00                                            | 11       | 15.00                                           |         |                                                 |        |                                                 | 11      | 2.00                                            | 11             | 1.00                                            |
| 12      | 33.00                                           | 12       | 62.00                                           |         |                                                 |        |                                                 | 12      | 6.00                                            | 12             | 6.00                                            |

|                    |       |    |       |                    |       |  |       |                    |       |  |       |
|--------------------|-------|----|-------|--------------------|-------|--|-------|--------------------|-------|--|-------|
| 13                 | 20.67 | 13 | 37.00 |                    |       |  |       |                    |       |  |       |
| 14                 | 23.00 | 14 | 6.00  |                    |       |  |       |                    |       |  |       |
|                    |       |    |       |                    |       |  |       |                    |       |  |       |
|                    |       |    |       |                    |       |  |       |                    |       |  |       |
|                    |       |    |       |                    |       |  |       |                    |       |  |       |
| Mean               | 17.90 |    | 31.86 | Mean               | 40.20 |  | 36.80 | Mean               | 16.50 |  | 14.17 |
| Median             | 16.67 |    | 28.83 | Median             | 33.50 |  | 32.50 | Median             | 15.50 |  | 10.00 |
| Standard Deviation | 14.49 |    | 19.32 | Standard Deviation | 21.61 |  | 18.74 | Standard Deviation | 14.16 |  | 12.96 |
| Student's T-Test   | 0.04  |    |       | Student's T-Test   | 0.71  |  |       | Student's T-Test   | 0.68  |  |       |
